# Supplementary material for: Oxygen-selective adsorption on high-silica LTA zeolite
Source: Royal Society of Chemistry journal article supplement (doi:10.1039/d0cc04484a), 2020-01-01
Supplement: d0cc04484a1.pdf [file d0cc04484a1.pdf]

## Electronic Supplementary Information

### Oxygen-selective adsorption on high-silica LTA zeolite

Hanbang Liu <sup>ab</sup>, Danhua Yuan, <sup>a</sup> Guangye Liu, <sup>a</sup> Jiacheng Xing, <sup>ab</sup> Zhongmin Liu <sup>a</sup>  
Yunpeng Xu, <sup>a\*</sup>

a. National Engineering Laboratory for Methanol to Olefins, Dalian National Laboratory for Clean Energy, Dalian Institute of Chemical Physics, Chinese Academy of Sciences, Dalian 116023, P. R. China.

b. University of Chinese Academy of Sciences, Beijing 100049, P. R. China.

\* E-mail: xuyunpeng@dicp.ac.cn.

## Experimental details

**2.1. Materials.** NaA, ZK-4 and NaUZM-9 samples were synthesized using the reported methods in the existing literature.<sup>1-3</sup> The LTA samples were dried at 100 °C before being calcined at 550 °C for 6h in air. The proton-type LTA samples referred to as NaA-H, ZK-4-H and NaUZM-9-H were obtained by NH<sub>4</sub><sup>+</sup> cation exchange and calcination. Ion-exchange was carried out by repeatedly treating the calcined LTA powders at 100 °C with 0.1mol/L NH<sub>4</sub>NO<sub>3</sub> solution (solid-to-liquid ratio 1:50) follow by filtration and washing with distilled water. The ion-exchanged samples were also calcined at 550 °C for 6h in air after drying at 100 °C.

**2.2. Characterization.** The powder X-ray diffraction (PXRD) patterns were collected on a PANalytical X'Pert PRO X-ray diffractometer. The  $\lambda$  of Cu-K $\alpha$  radiation is 1.54059 Å, which was operated at 40 kV and 40 mA. The step size was 0.02 °, and the scanning speed was 12 °/min. N<sub>2</sub> adsorption-desorption isotherms of the samples were measured on a Micromeritics ASAP2050 system at -196 °C, and the micropore region (P/P<sub>0</sub> < 0.02) of them were not measured. The Brunauer-Emmett-Teller (BET) equation was used to calculate the specific surface areas (S<sub>BET</sub>), then Micropore surface areas (S<sub>micro</sub>) and Micropore Volume (V<sub>m</sub>) were obtained based on t-plot method. The TG-DSC curves were obtained by TAQ-600 analyzer from room temperature to 1200 °C. The heating rate was 10 °C/min, and the air flow was 100 ml/min. The Si/Al and Na/Al of these samples were calculated by the Philips Magix-601X-ray fluorescence (XRF) spectrometer.

**2.3. O<sub>2</sub> and N<sub>2</sub> Adsorption Isotherm Measurements.** Adsorption isotherms of N<sub>2</sub> and O<sub>2</sub> were acquired on a Micromeritics ASAP2050 system at 25 °C, pressure up to 103 kPa or 900kPa. The purity of N<sub>2</sub> and O<sub>2</sub> were 99.999% without any purification.

**2.4. Molecular Simulation.** Molecular simulation was carried out by Materials Studio, using the CASTEP module. The Perdew-Wang (PW91) exchange-correlation functional within the generalized gradient approach (GGA) was used to perform Density functional theory (DFT) calculations.<sup>4</sup> To converge the total energy, a Self Consistent Field (SCF) tolerance of 0.002 meV/atom, a cutoff energy of 600 eV and a 2×2×2 k-point mesh were installed. All structure were optimized before introducing N<sub>2</sub> and O<sub>2</sub> molecules to Si-O-Al(Na) and Si-O-Si models. The single-point energy of optimized N<sub>2</sub>, O<sub>2</sub> and Na<sup>+</sup> were calculated by placing them in a cell which had the same cell dimensions as the cluster models respectively. Interaction energies (IE) between the fragments of zeolites and N<sub>2</sub>/O<sub>2</sub> molecules were calculated as:

$$IE = E_{\text{complex}} - (E_{\text{cluster}} + E_{\text{Na}} + E_{\text{adsorbate}}) \quad (1)$$

$$IE = E_{\text{complex}} - (E_{\text{cluster}} + E_{\text{adsorbate}}) \quad (2)$$

$E_{\text{complex}}$  is the total energy of the optimized adsorption fragment-adsorbate complex,  $E_{\text{cluster}}$ ,  $E_{\text{Na}}$  and  $E_{\text{adsorbate}}$  are the single-point energy of Si-O-Al(Na) or Si-O-Si fragment, Na<sup>+</sup> and adsorbate molecule N<sub>2</sub>/O<sub>2</sub>, respectively.

**2.5. Adsorption theories.** In this work, we used Langmuir-Freundlich 1 site model to fit the adsorption isotherms of single component N<sub>2</sub> and O<sub>2</sub> at 25 °C and pressure up to 103 kPa or 900 kPa.<sup>5</sup> The equation can be expressed as:

$$q = q_m b p^{1/n} / (1 + b p^{1/n}) \quad (3)$$

where  $q$  (mmol/g) are the amounts of N<sub>2</sub> or O<sub>2</sub> adsorbed in equilibrium,  $q_m$  is the amounts of N<sub>2</sub>

or O<sub>2</sub> adsorbed at saturation (mmol/g), p is the bulk gas pressure in equilibrium (kPa), b is the adsorption equilibrium constant and n is a model constant.

The adsorption selectivity of O<sub>2</sub> over N<sub>2</sub> was obtained from the single component adsorption isotherms according to IAST (ideal adsorption solution theory).<sup>6</sup> The final adsorption O<sub>2</sub>/N<sub>2</sub> selectivity was calculated as:

$$S_{O_2/N_2} = (x_1/y_1)/(x_2/y_2) \quad (4)$$

The mole fractions of O<sub>2</sub> and N<sub>2</sub> in the adsorbed phase are x<sub>1</sub> and x<sub>2</sub> respectively, and the mole fractions of components O<sub>2</sub> and N<sub>2</sub> in the gas phase are y<sub>1</sub> and y<sub>2</sub>, respectively.

The Langmuir model and Freundlich model were also used to fit the adsorption isotherms of single component N<sub>2</sub> and O<sub>2</sub> at 25 °C and pressure up to 103 kPa.<sup>5</sup> The Langmuir equation can be expressed as:

$$q = q_m b p / (1 + b p) \quad (5)$$

where q (mmol/g) are the amounts of N<sub>2</sub> or O<sub>2</sub> adsorbed in equilibrium, q<sub>m</sub> is the amounts of N<sub>2</sub> or O<sub>2</sub> adsorbed at saturation (mmol/g), p is the bulk gas pressure in equilibrium (kPa), b is the adsorption equilibrium constant.

The Freundlich equation can be expressed as:

$$q = K p^{1/n} \quad (6)$$

where q (mmol/g) are the amounts of N<sub>2</sub> or O<sub>2</sub> adsorbed in equilibrium, p is the bulk gas pressure in equilibrium (kPa), K and n are the model constants.

It is worth noting that Langmuir-Freundlich, Langmuir and Freundlich equations can all fit the N<sub>2</sub> and O<sub>2</sub> adsorption behavior at the low-pressure region. In fact, two fit parameters are already sufficient for these isotherms, and the Langmuir equation whose parameters have a physical meaning is more applicable than Freundlich equation in this work. In addition, the Langmuir-Freundlich equation gives a slightly more accurate correlation than the Langmuir and Freundlich models because it has more adjustable parameters,<sup>5</sup> which was used to calculate the O<sub>2</sub>/N<sub>2</sub> selectivity.

## Supporting Figures and Tables

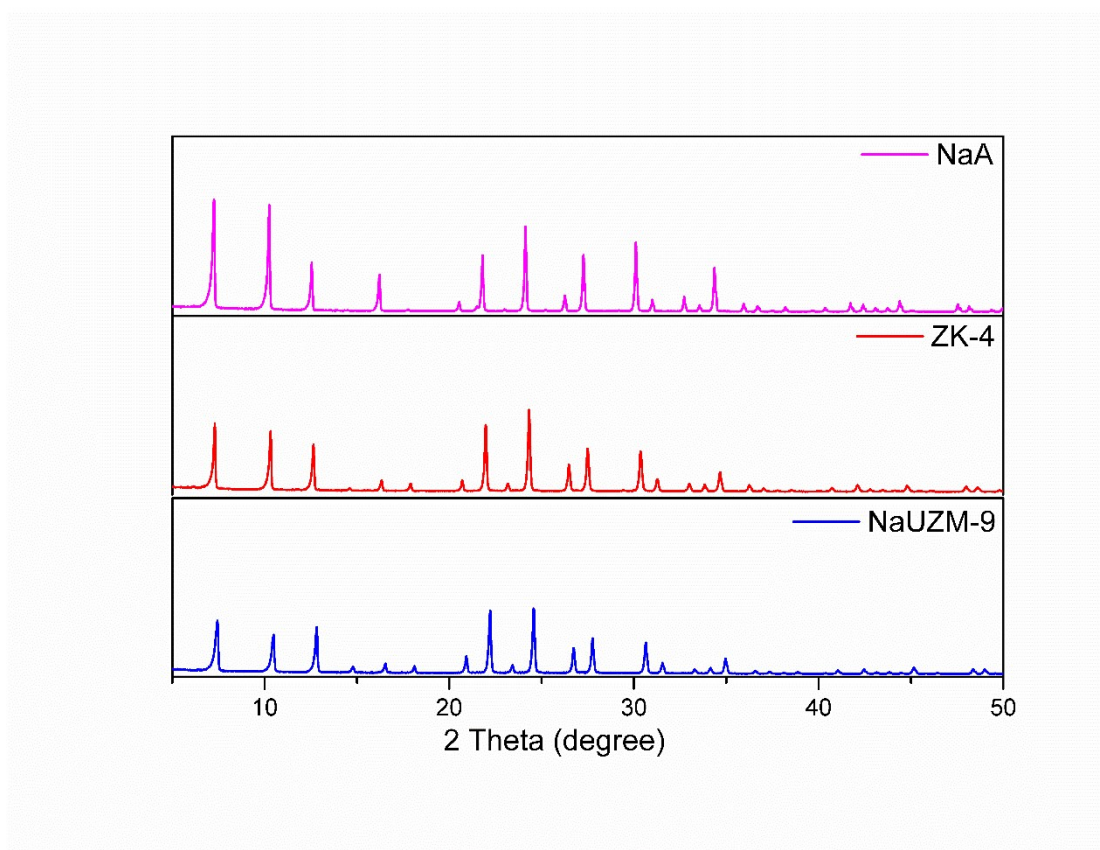

**Fig. S1** XRD patterns of the as-synthesized samples NaA, ZK-4 and NaUZM-9.

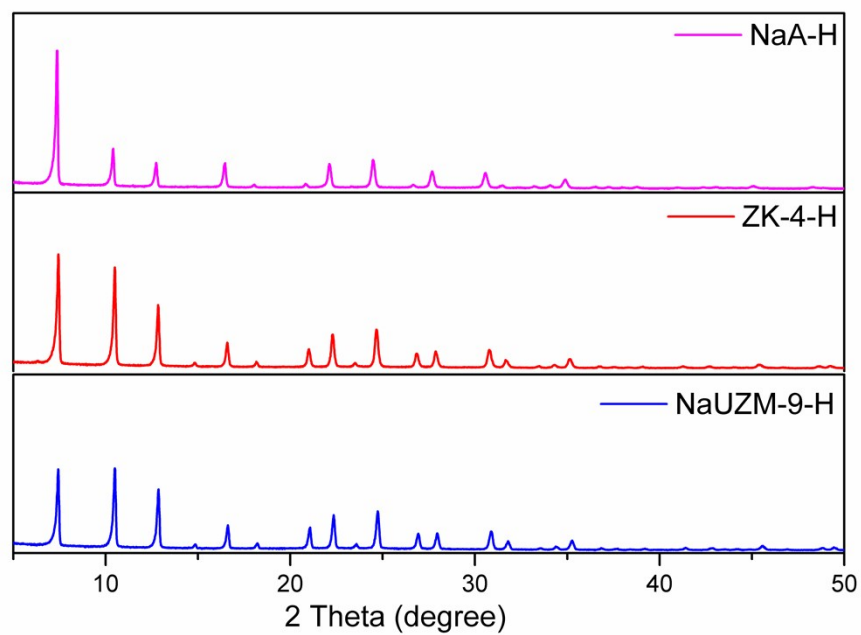

**Fig. S2** XRD patterns of the as-synthesized samples NaA-H, ZK-4-H and NaUZM-9-H.

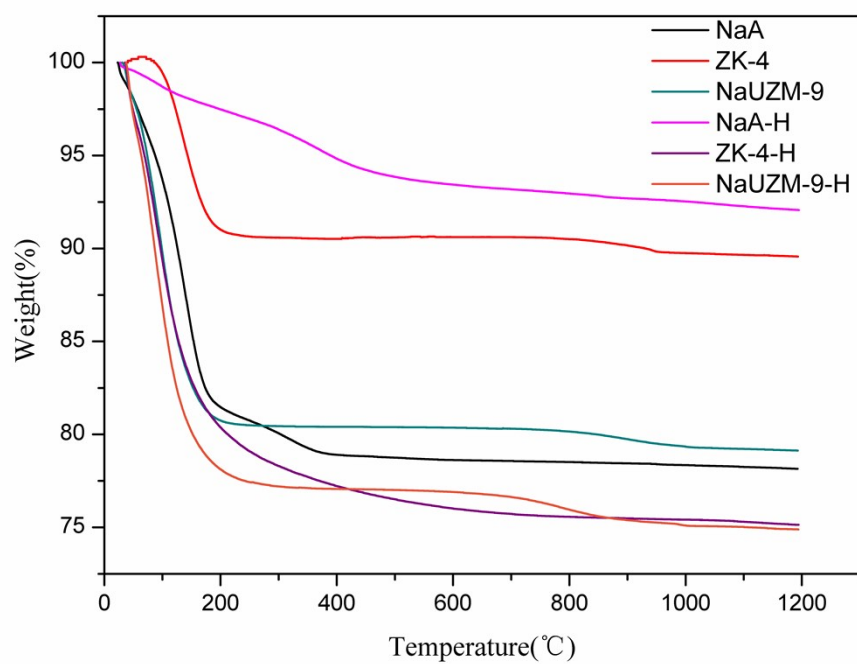

**Fig. S3** TG curves of LTA and LTA-H.

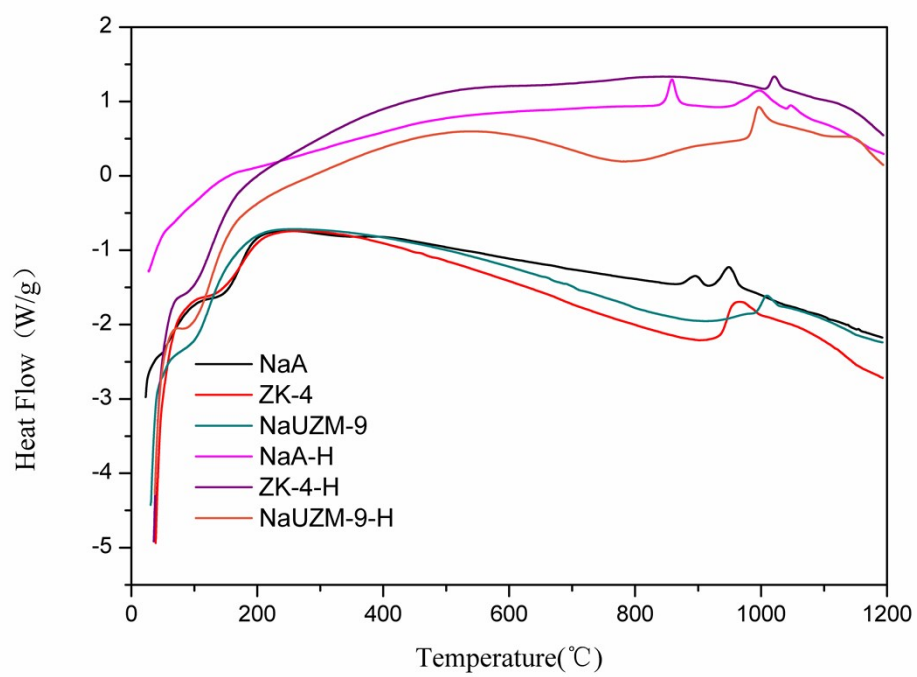

**Fig. S4** DSC curves of LTA and LTA-H.

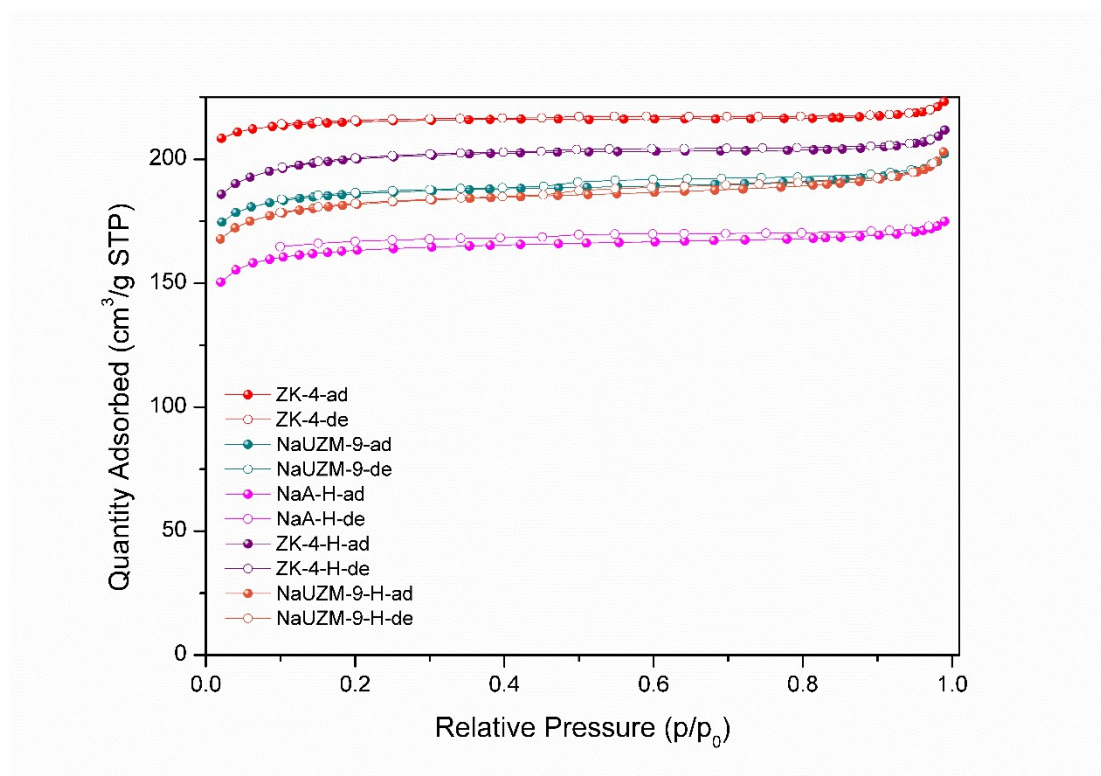

**Fig. S5**  $N_2$  adsorption-desorption isotherms of LTA and H-form LTA samples at  $-196\text{ }^{\circ}\text{C}$  (adsorption: filled circle, desorption: hollow circle).

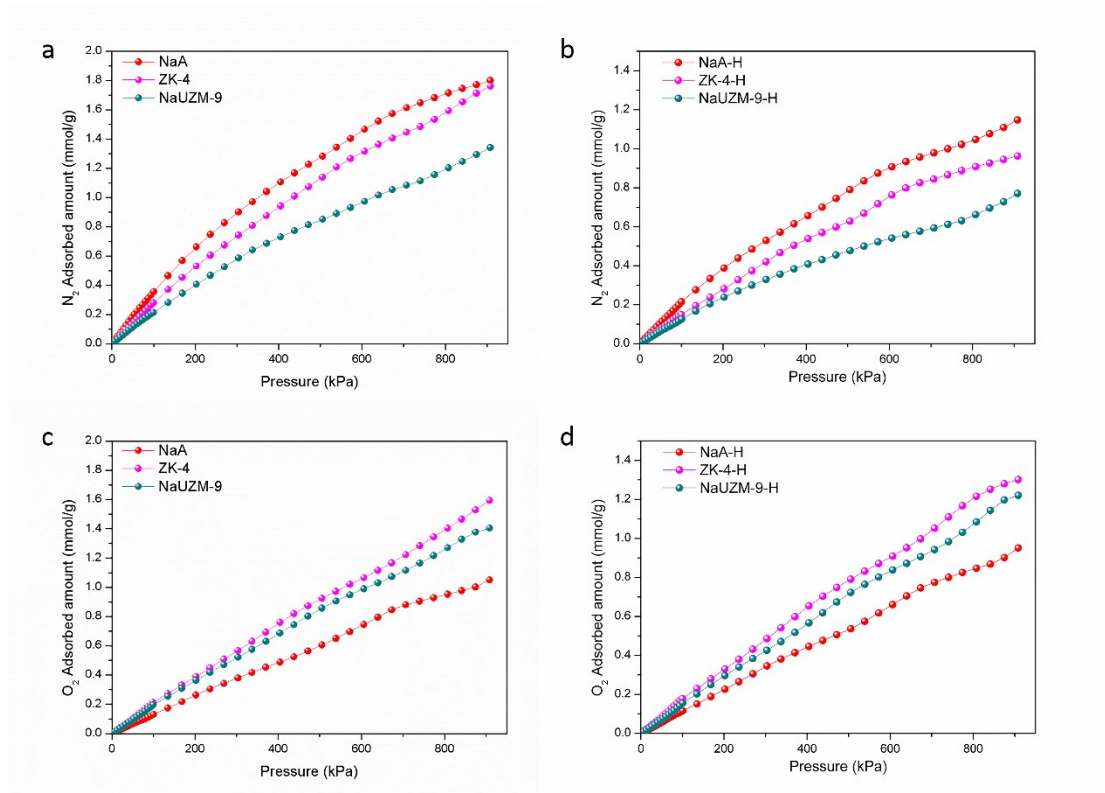

**Fig. S6**  $N_2$  adsorption isotherms of the LTA (a) and LTA-H (b) samples at 25 °C and the pressures up to 900 kPa;  $O_2$  adsorption isotherms of the LTA (c) and LTA-H (d) samples at 25 °C and the pressures up to 900 kPa.

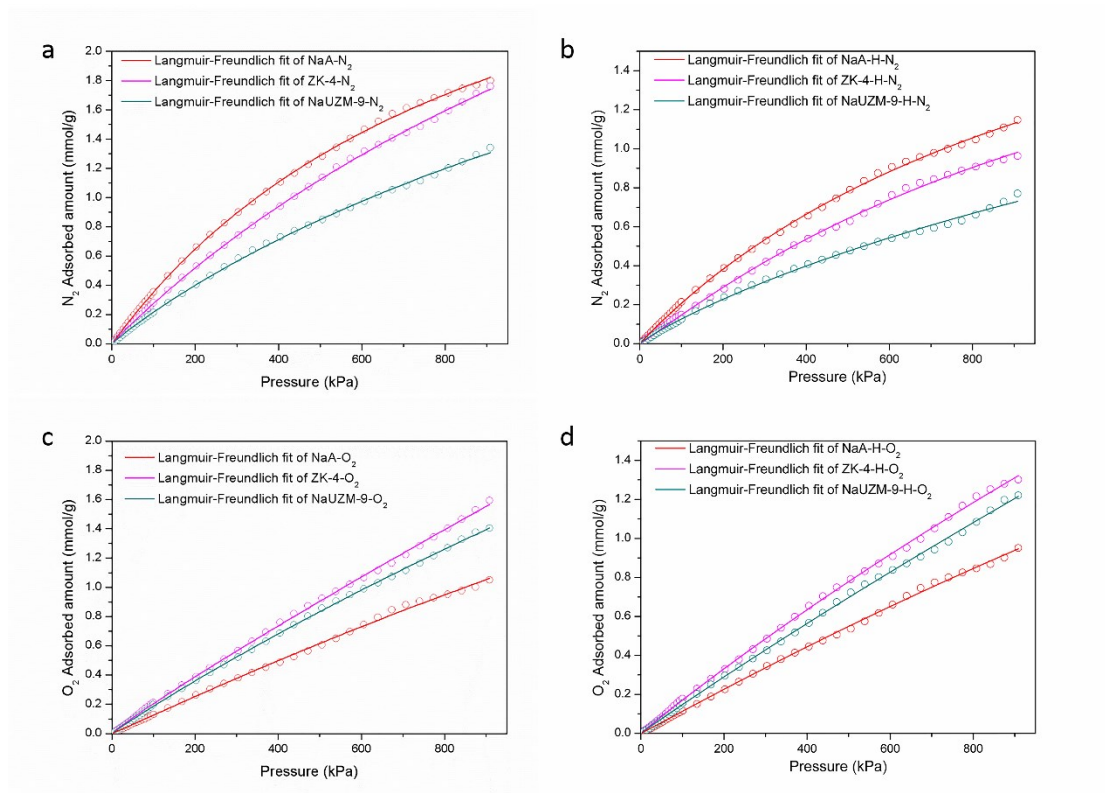

**Fig. S7** N<sub>2</sub> fitting curves of the LTA (a) and LTA-H (b) samples at 25 °C and the pressures up to 900 kPa by Langmuir-Freundlich model; O<sub>2</sub> fitting curves of the LTA (c) and LTA-H (d) samples at 25 °C and the pressures up to 900 kPa by Langmuir-Freundlich model.

**Table S1.** Fitting parameters of the Langmuir-Freundlich 1 site model at 25 °C and pressure up to 103 kPa.

| Parameters |                | $q_m$  | $b$      | $1/n$ | $R^2$    |
|------------|----------------|--------|----------|-------|----------|
| NaA        | N <sub>2</sub> | 3.339  | 0.00120  | 1.006 | 0.999841 |
|            | O <sub>2</sub> | 1.542  | 0.000786 | 1.035 | 0.999992 |
| ZK-4       | N <sub>2</sub> | 4.214  | 0.000723 | 1.002 | 0.999867 |
|            | O <sub>2</sub> | 14.333 | 0.000146 | 1.004 | 0.999896 |
| NaUZM-9    | N <sub>2</sub> | 3.084  | 0.000824 | 1.001 | 0.999904 |
|            | O <sub>2</sub> | 9.552  | 0.000227 | 0.993 | 0.999846 |
| NaA-H      | N <sub>2</sub> | 1.710  | 0.00144  | 1.045 | 0.999752 |
|            | O <sub>2</sub> | 3.132  | 0.000411 | 1.020 | 0.999927 |
| ZK-4-H     | N <sub>2</sub> | 3.382  | 0.000545 | 0.996 | 0.999931 |
|            | O <sub>2</sub> | 8.298  | 0.000283 | 0.965 | 0.999646 |
| NaUZM-9-H  | N <sub>2</sub> | 4.141  | 0.000380 | 1.002 | 0.999927 |
|            | O <sub>2</sub> | 8.545  | 0.000281 | 0.956 | 0.999321 |

**Table S2.** Fitting parameters of the Langmuir model at 25 °C and pressure up to 103 kPa.

| Parameters |                | $q_m$  | $b$      | $R^2$    |
|------------|----------------|--------|----------|----------|
| NaA        | N <sub>2</sub> | 3.565  | 0.00115  | 0.999786 |
|            | O <sub>2</sub> | 4.454  | 0.000302 | 0.999979 |
| ZK-4       | N <sub>2</sub> | 4.430  | 0.000692 | 0.999887 |
|            | O <sub>2</sub> | 13.987 | 0.000153 | 0.999879 |
| NaUZM-9    | N <sub>2</sub> | 3.117  | 0.000816 | 0.999895 |
|            | O <sub>2</sub> | 7.205  | 0.000293 | 0.999853 |
| NaA-H      | N <sub>2</sub> | 3.488  | 0.000802 | 0.999853 |
|            | O <sub>2</sub> | 3.522  | 0.000396 | 0.999856 |
| ZK-4-H     | N <sub>2</sub> | 3.168  | 0.000573 | 0.999981 |
|            | O <sub>2</sub> | 3.707  | 0.000302 | 0.999835 |
| NaUZM-9-H  | N <sub>2</sub> | 4.541  | 0.000349 | 0.999990 |
|            | O <sub>2</sub> | 6.798  | 0.000294 | 0.999661 |

**Table S3.** Fitting parameters of the Freundlich model at 25 °C and pressure up to 103 kPa.

| Parameters |                | K       | 1/n   | R <sup>2</sup> |
|------------|----------------|---------|-------|----------------|
| NaA        | N <sub>2</sub> | 0.00473 | 0.946 | 0.999718       |
|            | O <sub>2</sub> | 0.00139 | 0.987 | 0.999959       |
| ZK-4       | N <sub>2</sub> | 0.00339 | 0.964 | 0.999617       |
|            | O <sub>2</sub> | 0.00188 | 1.027 | 0.999967       |
| NaUZM-9    | N <sub>2</sub> | 0.00286 | 0.958 | 0.999640       |
|            | O <sub>2</sub> | 0.00193 | 1.016 | 0.999951       |
| NaA-H      | N <sub>2</sub> | 0.00311 | 0.961 | 0.999419       |
|            | O <sub>2</sub> | 0.00123 | 1.023 | 0.999986       |
| ZK-4-H     | N <sub>2</sub> | 0.00187 | 0.983 | 0.999934       |
|            | O <sub>2</sub> | 0.00195 | 1.004 | 0.999930       |
| NaUZM-9-H  | N <sub>2</sub> | 0.00167 | 0.982 | 0.999896       |
|            | O <sub>2</sub> | 0.00185 | 1.012 | 0.999841       |

## References

1. R. W. Thompson and M. J. Huber, *J. Cryst. Growth*, 1982, **56**, 711-722.
2. T. Kodaira and T. Ikeda, *J. Phys. Chem. C*, 2010, **114**, 12885-12895.
3. G. J. Lewis, M. A. Miller, J. G. Moscoso, B. A. Wilson, L. M. Knight and S. T. Wilson, in *S. T. Stud. Surf. Sci. Catal*, 2004, vol. 154, pp. 364-372.
4. Y. Wu, D. Yuan, D. He, J. Xing, S. Zeng, S. Xu, Y. Xu and Z. Liu, *Angew. Chem. Int. Ed.*, 2019, **58**, 10241-10244.
5. B. U. Choi, D. K. Choi, Y. W. Lee, B. K. Lee and S. H. Kim, *J. Chem. Eng. Data*, 2003, **48**, 603-607.
6. A. L. Myers and J. M. Prausnitz, *AIChE J.*, 1965, **11**, 121-127.
